# Supplementary material for: Limited Local Clinical Trials for the New Cancer Treatment Technology Karanahan for Patients with Advanced Breast Cancer
Source: Preprints.org preprint supplement (doi:10.20944/preprints202409.2002.v1), 2024-09-25
Supplement: Supplementary file 1 [file supplementary]

Supplementary Material 1. The procedure for intratumoral injection of DNA preparation

**
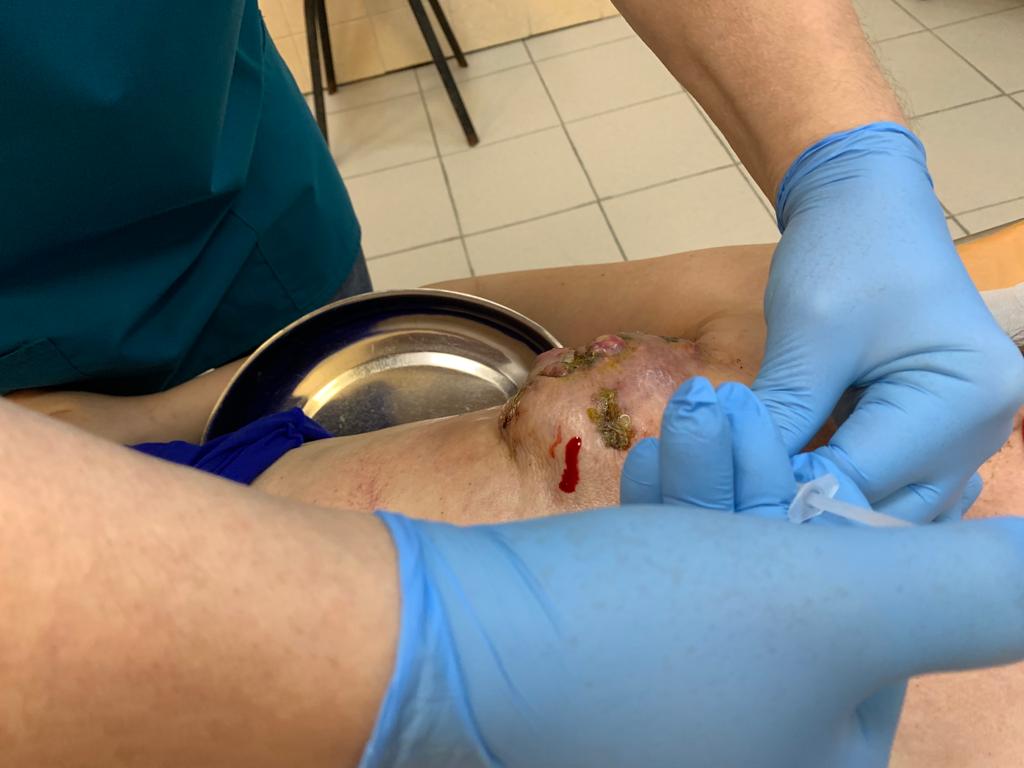

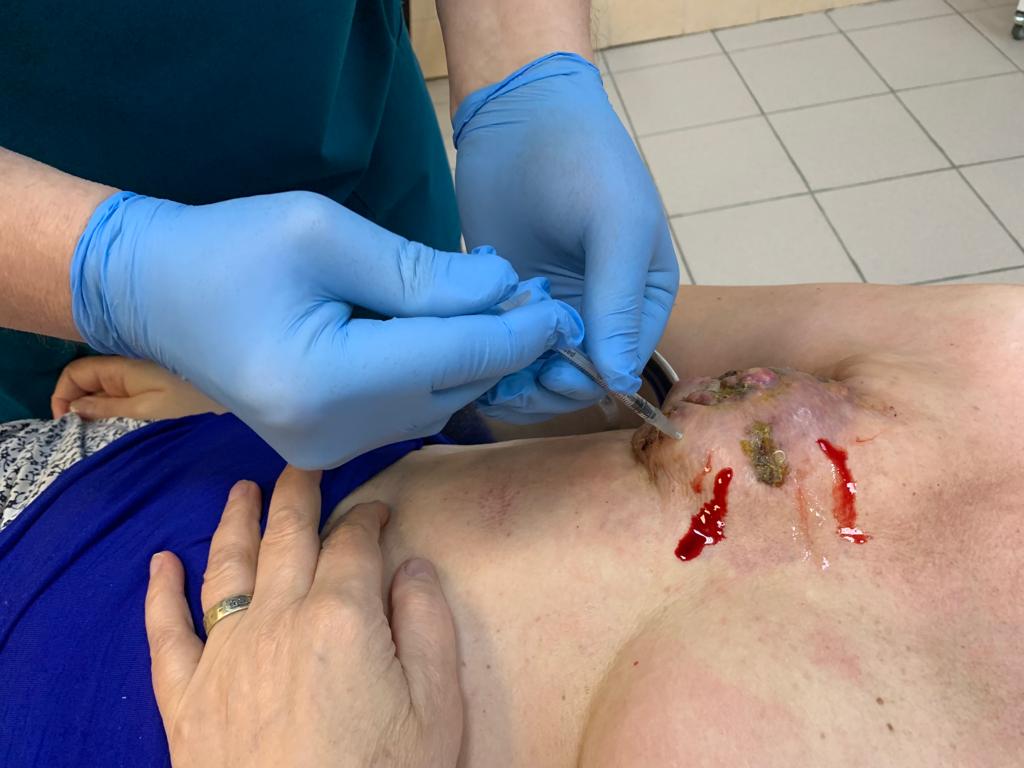

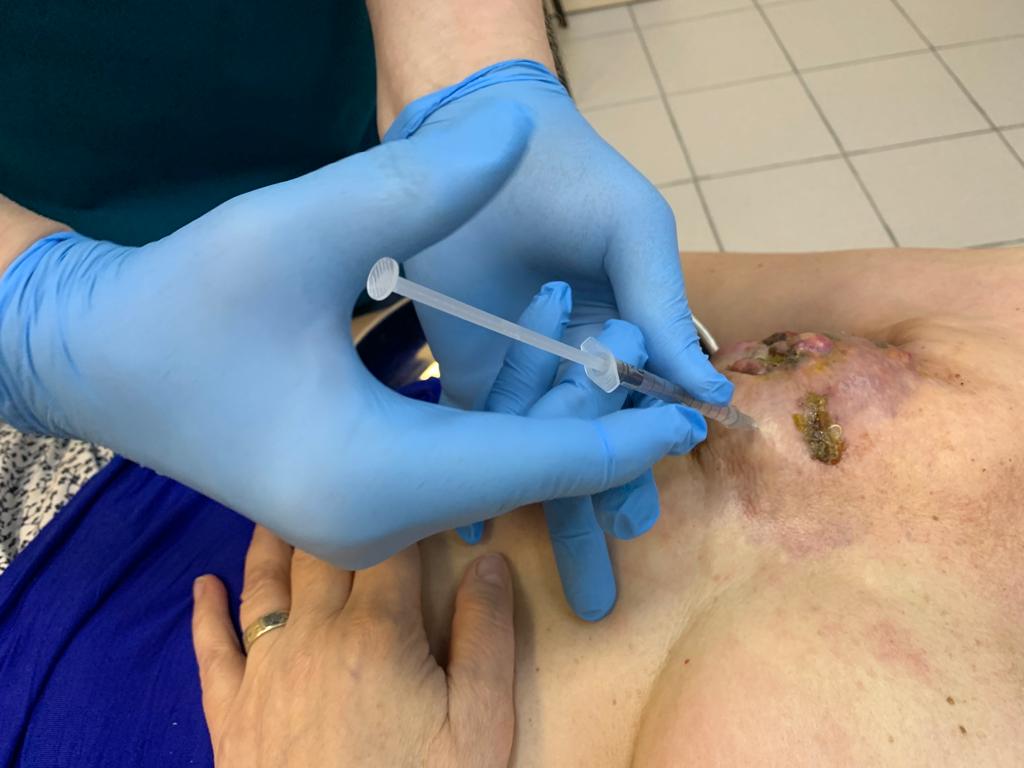
**

Figure S1. The procedure for intratumoral injection of DNA preparation.
