# Supplementary material for: Limited Local Clinical Trials for the New Cancer Treatment Technology Karanahan for Patients with Advanced Breast Cancer
Source: Preprints.org preprint supplement (doi:10.20944/preprints202409.2002.v1), 2024-09-25
Supplement: Supplementary file 6 [file SuppMat5 - TREGs CD8.docx]

Supplementary Material 5. Quantification of regulatory T cells and CD8 populations in peripheral blood


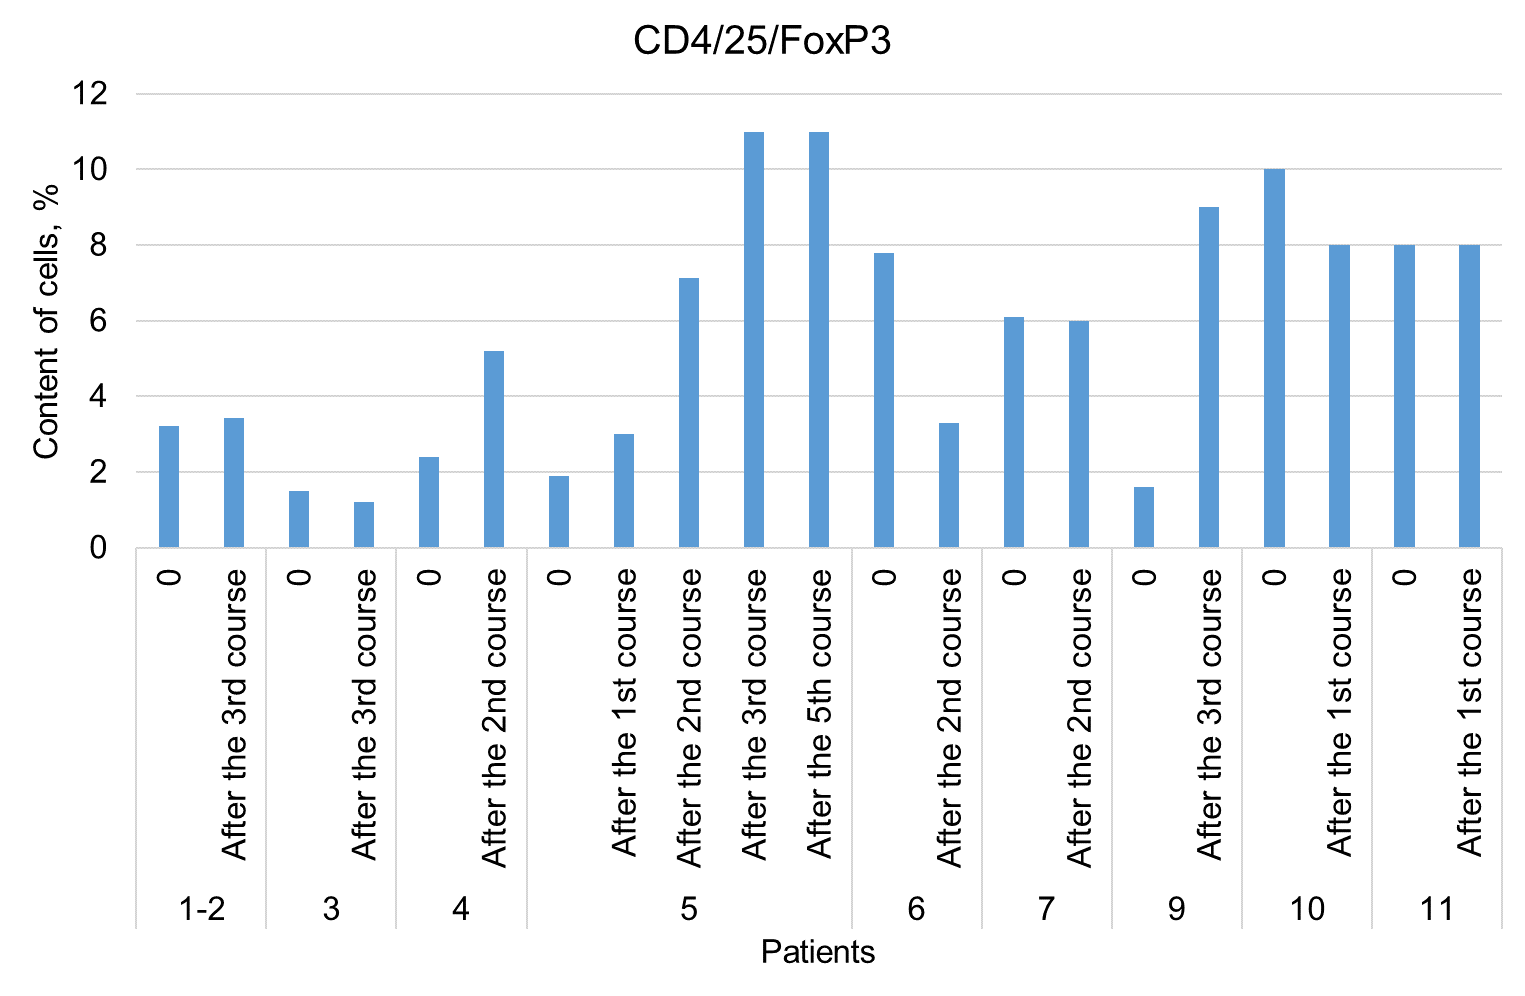


Figure S5-1. Content of CD4/25/FoxP3 cells in patients’ peripheral blood before and after *Karanahan* therapy.


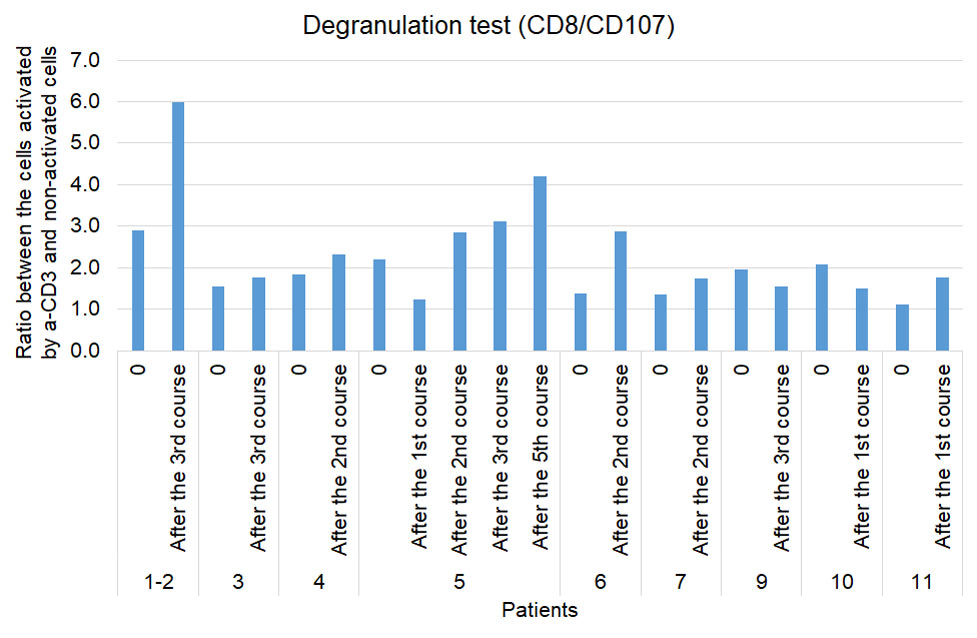


Figure S5-2. Results of degranulation test with lymphocytes from patients’ peripheral blood before and after *Karanahan* therapy.
